# Supplementary material
Source: Research Square preprint supplement (doi:10.21203/rs.3.rs-8650943/v1)
Supplement: Supplementary file 1 [file 269b3662694e4c3c646f9da0.docx]

**Table 1** Primer sequences for identification of K. pneumoniae

| **Primer name Primer sequence (5 ‘-3’) Fragment size (bp) Annealing temperature (°C)** |
| --- |
| *Khe* F: ACAGCCCGGAGCGTTTTTC 285 bp 61  R: ACCACCAGCAGACGAACYTCC  16SrRNA F:AGAGTTTGATCCTGGCTCAG 1500bp 55  R:CGGTTACCTTGTTACGACTTC |

**Table 2** *K. pneumoniae* typing identification primer sequence

| **Gene name Primer sequence (5 ‘-3’) Fragment size (bp)** |
| --- |
| *ropB* F: GTTTTCCCAGTCACGACGTTGTAGGCGAAATGGCWGAGAACCA  R: TTGTGAGCGGATAACAATTTCGAGTCTTCGAAGTTGTAACC 1075  *gapA* F: GTTTTCCCAGTCACGACGTTGTATGAAATATGACTCCACTCACGG  R: TTGTGAGCGGATAACAATTTCCTTCAGAAGCGGCTTTGATGGCTT 662  *mdh* F: GTTTTCCCAGTCACGACGTTGTA CCCAACTCGCTTCAGGTTCAG  R: TTGTGAGCGGATAACAATTTCCCGTTTTTCCCCAGCAGCAG 756  *pgi* F: GTTTTCCCAGTCACGACGTTGTAGAGAAAAACCTGCCTGTACTGCTGGC  R: TTGTGAGCGGATAACAATTTCCGCGCCACGCTTTATAGCGGTTAAT 566  *phoE* F: GTTTTCCCAGTCACGACGTTGTAACCTACCGCAACACCGACTTCTTCGG  R: TTGTGAGCGGATAACAATTTCTGATCAGAACTGGTAGGTGAT 602  *infB* F: GTTTTCCCAGTCACGACGTTGTACTCGCTGCTGGACTATATTCG  R: TTGTGAGCGGATAACAATTTC CGCTTTCAGCTCAAGAACTTC 462  *tonB* F: GTTTTCCCAGTCACGACGTTGTACTTTATACCTCGGTACATCAGGTT  R: TTGTGAGCGGATAACAATTTCATTCGCCGGCTGRGCRGAGAG 539 |

**Table 3** Criteria for determining the dosage and drug resistance of tablets

| **Antibiotic**  **name** | **Drug content (µg/ tablet)** | **Criteria for determining the diameter of the antibacterial zone/ mm** | | |
| --- | --- | --- | --- | --- |
| R | I | S |
| PEN | 10 | ≤13 | 14-16 | ≥17 |
| AMP | 10 | ≤13 | 14-16 | ≥17 |
| PIP | 100 | ≤14 | 15-20 | ≥21 |
| CXM | 30 | ≤14 | 15-17 | ≥18 |
| CTR | 30 | ≤19 | 20-22 | ≥23 |
| CEX | 30 | ≤14 | 15-17 | ≥18 |
| CFP | 75 | ≤15 | 16-20 | ≥21 |
| CAZ | 30 | ≤17 | 18-20 | ≥21 |
| CZ | 30 | ≤19 | 20-22 | ≥23 |
| GEN | 10 | ≤12 | 13-14 | ≥15 |
| KAN | 30 | ≤13 | 14-17 | ≥18 |
| STR | 10 | ≤11 | 12-14 | ≥15 |
| AMK | 30 | ≤14 | 15-16 | ≥17 |
| ERY | 15 | ≤13 | 14-22 | ≥23 |
| LIN | 2 | ≤14 | 15-21 | ≥22 |
| VAN | 30 | ≤14 | 15-16 | ≥17 |
| TET | 30 | ≤11 | 12-14 | ≥15 |
| MIN | 30 | ≤12 | 13-15 | ≥16 |
| DO | 30 | ≤10 | 11-13 | ≥14 |
| PB | 30IU | ≤8 | 9-11 | ≥12 |

Table 4 Primer sequences for resistance genes of *K. pneumoniae*

| **Types of antibacterial drugs Primer name Primer sequence (5 ‘-3’) Fragment size (bp) Annealing temperature (°C)** |
| --- |
| β - lactams *bla*TEM F: TCGCCGCATACACTATTCTCAGAATGA  R: ACGCTCACCGGCTCCAGATTTAT 445 55  *Bla*CTXF: ACTTCAGCCACACGGATTCA  R: AAGTGGAGCGACAGAGC 905 57  *bla*NDMF: GGTTTGGCGATCTGGTTTTC  R: CGGAATGGCTCATCACGATC 621 55  *bla*OXA−48F: GCGTGGTTAAGGATGAACAC  R: CATCAAGTTCAACCCAACCG 438 55  *bla*IMPF: GGAATAGAGTGGCTTAAYTCTC  R: GGTTTAAYAAAACAACCACC 232 55  *bla*VIMF: GATGGTGTTTGGTCGCATA  R: CGAATGCGCAGCACCAG 390 55  *bla*DHAF: GCCTGTTTGGTGCTCTGA  R: GCACGGTTATACGGCTGA 460 55  *Bla*KPCF: CGTCTAGTTCTGCTGTCTTG  R: CTTGTCATCCTTGTTAGGCG 798 55  Aminoglycosides *aadA* F: GTGGATGGCGGCCTGAAGCC  R: AATGCCCAGTCGGCAGCG 525 62  Tetracyclines *tet(B)* F: AAACCATTACGGCATTCTGC  R: GACCGGATACACCATCCATC 659 55  Chloramphenicol class *cmlA* F: GGCCTCGCTCTTACGTCATC  R: GCGACACCAATACCCACTAGC 989 57  *floR* F: TATCTCCCTGTCGTTCCAG  R: AGAACTCGCCGATCAATG 399 53  Sulfonamide class *sul2* F: CGGCATCGTCAACATAACCT  R: TGTGCGGATGAAGTCAGCTC 721 66  Quinolones *parC* F: CTGGGTAAATACCATCCGCAC  R: CGGTTCATCTTCATTACGAA 987 59  *gyrA* F: ATGAGCGACCCTTGCGAGAGAAAT  R: AGCCCTTCAATGCTGATGTCTTC 685 60  *gyrB* F: CCTCCCAGACCAAAGACAAACT  R: CAGCATTGCTTTCGGATAACG 821 53 |

**Table 5** Primer sequences for virulence genes of *K. pneumoniae*

| **Toxicity gene types Primer name Primer sequence (5 ‘-3’) Fragment size (bp) Annealing temperature (°C)** |
| --- |
| Pili *fimH* F: GTCTACGTTAACCTGACCCCG  R: ATTGATAGACAAAGGTGATGCCGAT 781 56  *mrkD* F: AAGCTATCGCTGTACTTCCGGCA  R: GGCGTTGGCGCTCAGATAGG 340 60  lipopolysaccharide *uge* F: TCTTCACGCCTTCCTTCACT  R: GATCATCCGGTCTCCCTGT 534 53  *wabG* F: CTCTGGTGCGGCAGAAGTAC  R: TGGCCGTCGACGATAAACTC 931 52  Capsule *rmpA* F: ACCCTTTACAGCCAAATTTTCTTGT  R: CTGGGCTACCTCTGCTTCATAT 468 52  *magA* F: CGCCGCAAATACGAGAAGTG  R: GCAATCGAAGTGAAGAGTGC 1300 52  *iroN* F: GAATGAAACTACCGCCCCCA  R: TGTGGAGTGGAGGCGAGATA 1033 54  Iron carrier *entB* F: ATTTCCTCAACTTCTGGGGC  R: AGCATCGGTGGCGGTGGTCA 371 60  *iucA* F: GCTTATTTCTCCCCAACCC  R: TCAGCCCTTTAGCGACAAG 583 59  *kfu* F: GAAGTGACGCTGTTTCTGGC  R: TTTCGTGTGGCCAGTGACTC 797 55  llantoin *allS* F: CTTCAGCAGATAAATGACGGGGTAG  R: GTGGGTAAACCGCCATATTTTCC 244 56  urease *ureA* F: GCTGACTTAAGAGAACGTTATG  R: GATCATGGCGCTACCT(C/T)A 337 55 |
