# Supplementary material
Source: Research Square preprint supplement (doi:10.21203/rs.3.rs-8650943/v1)

Fig.1C


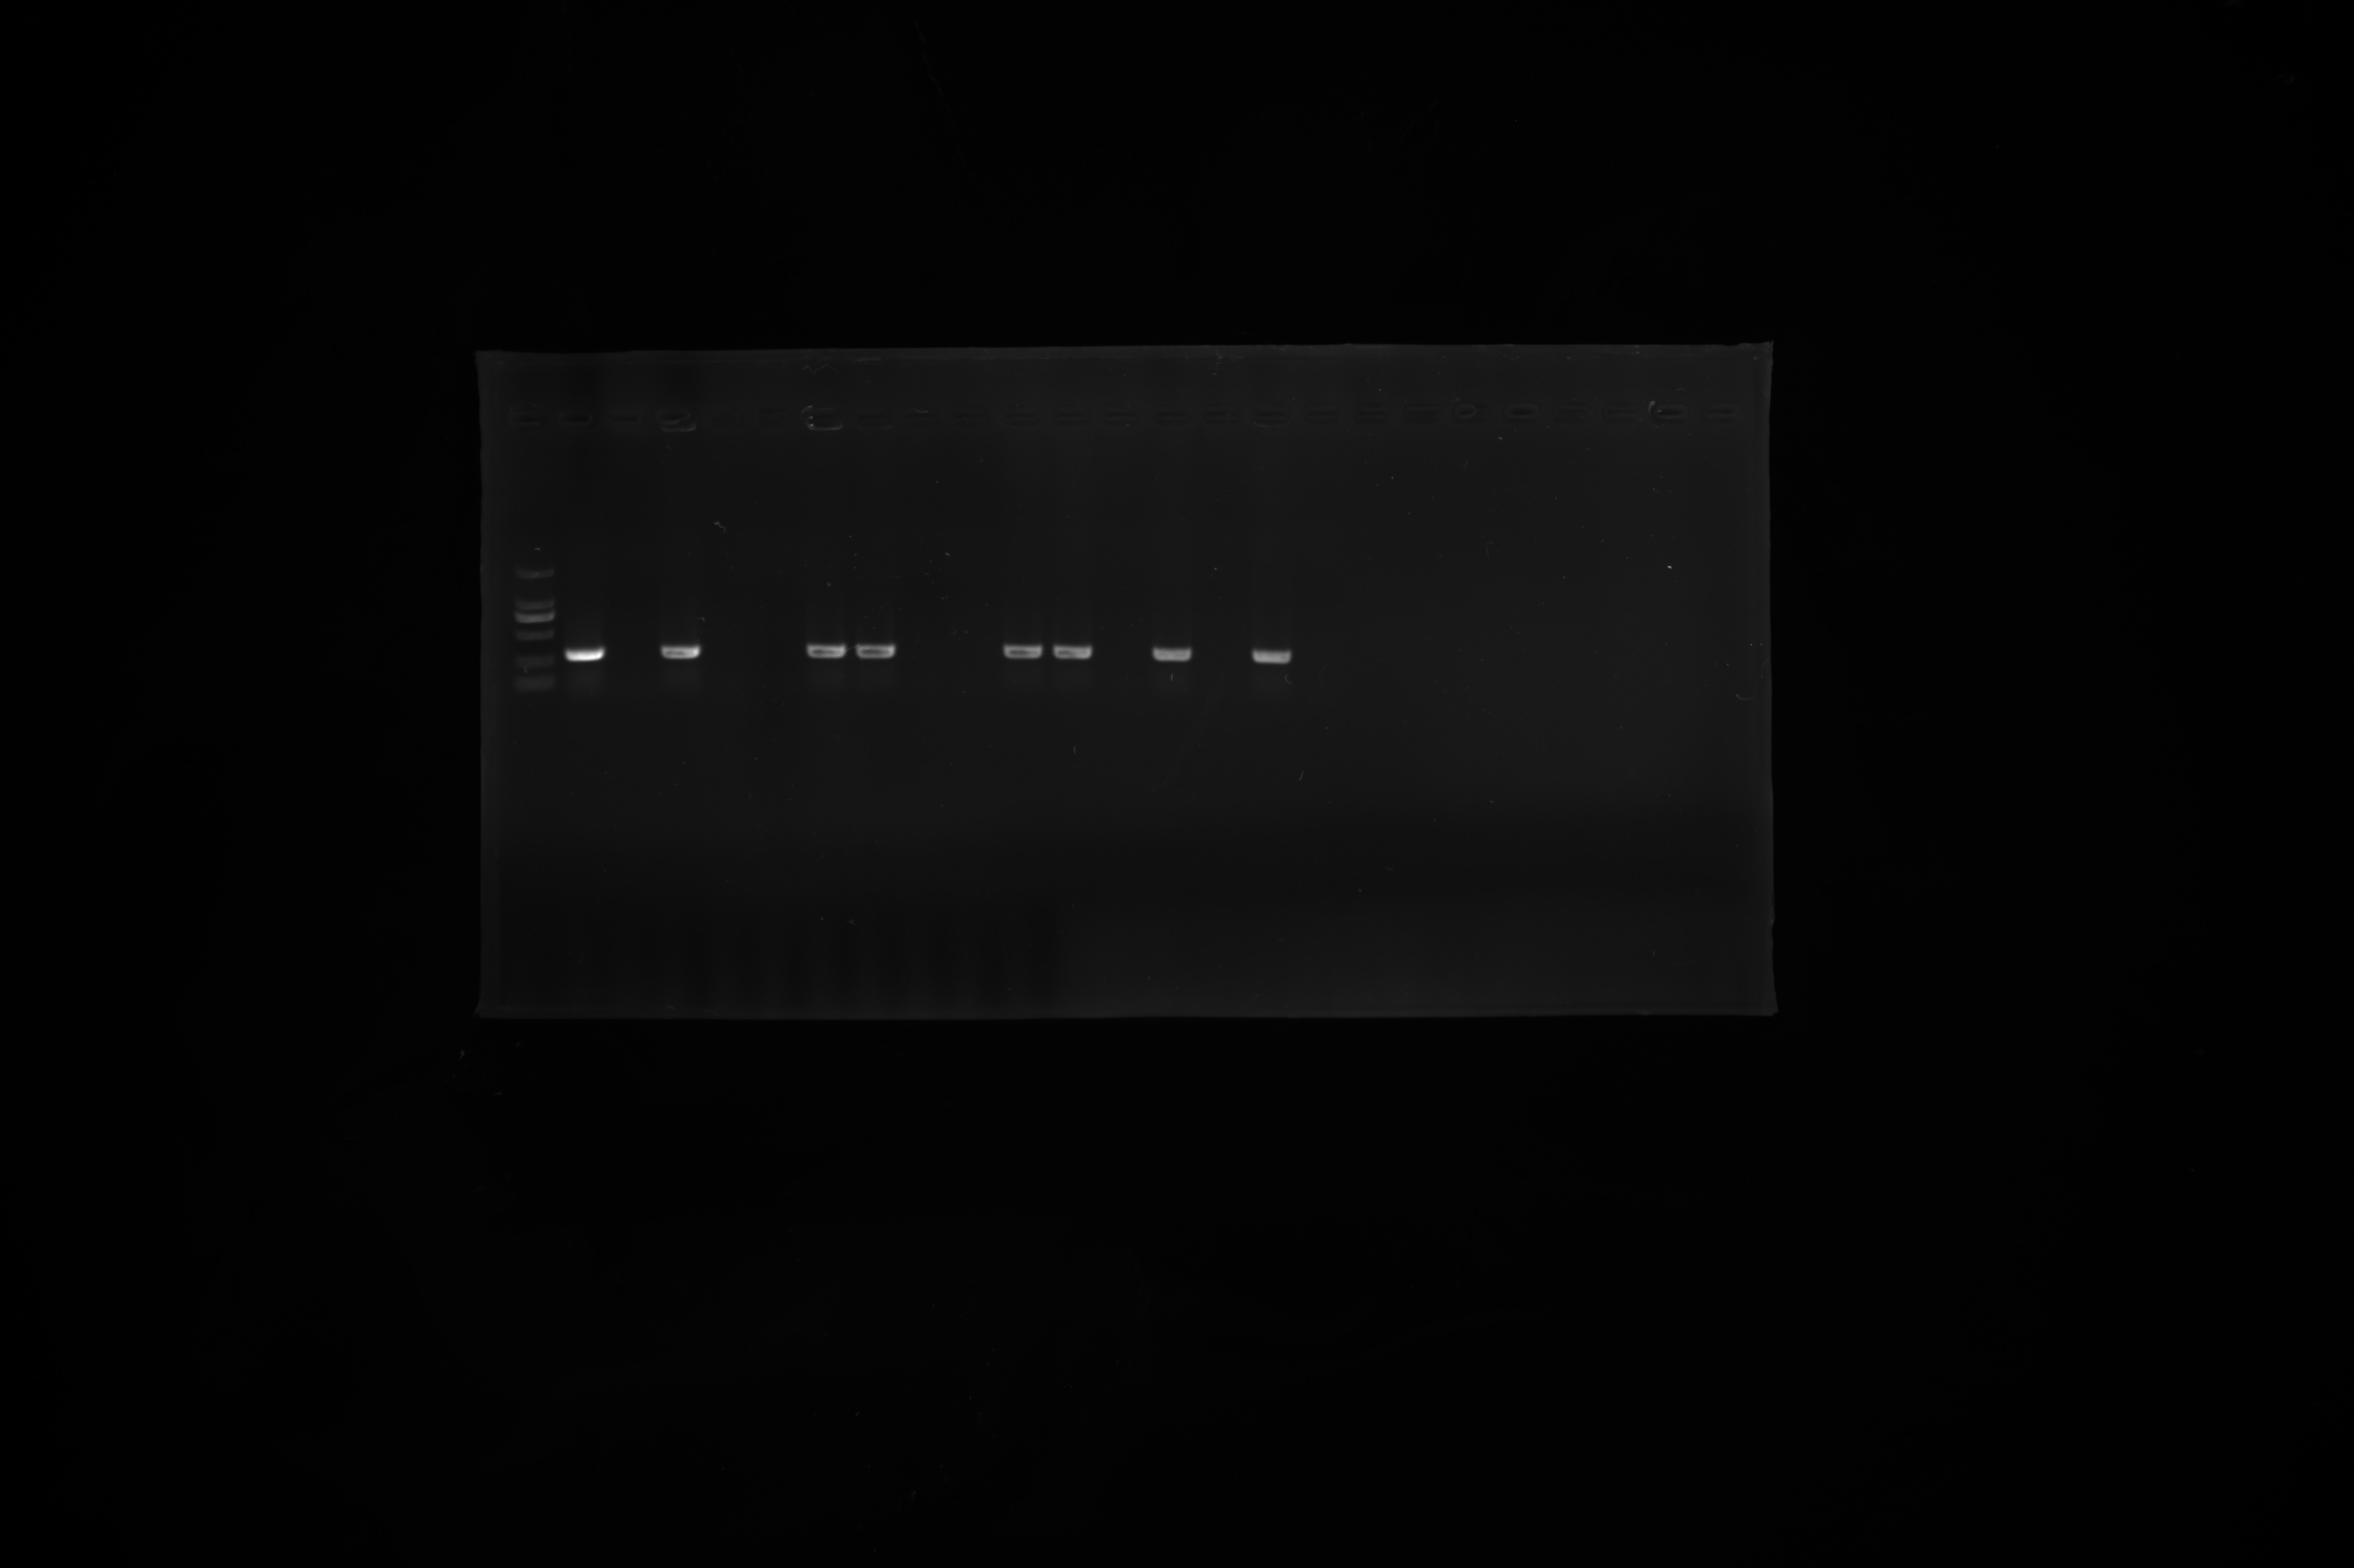


285bp

bp

2000

1000

750

500

250

100

Mock + 1 2 3 4 5 6 - - 7 8 9 10 11 12

Fig.2A


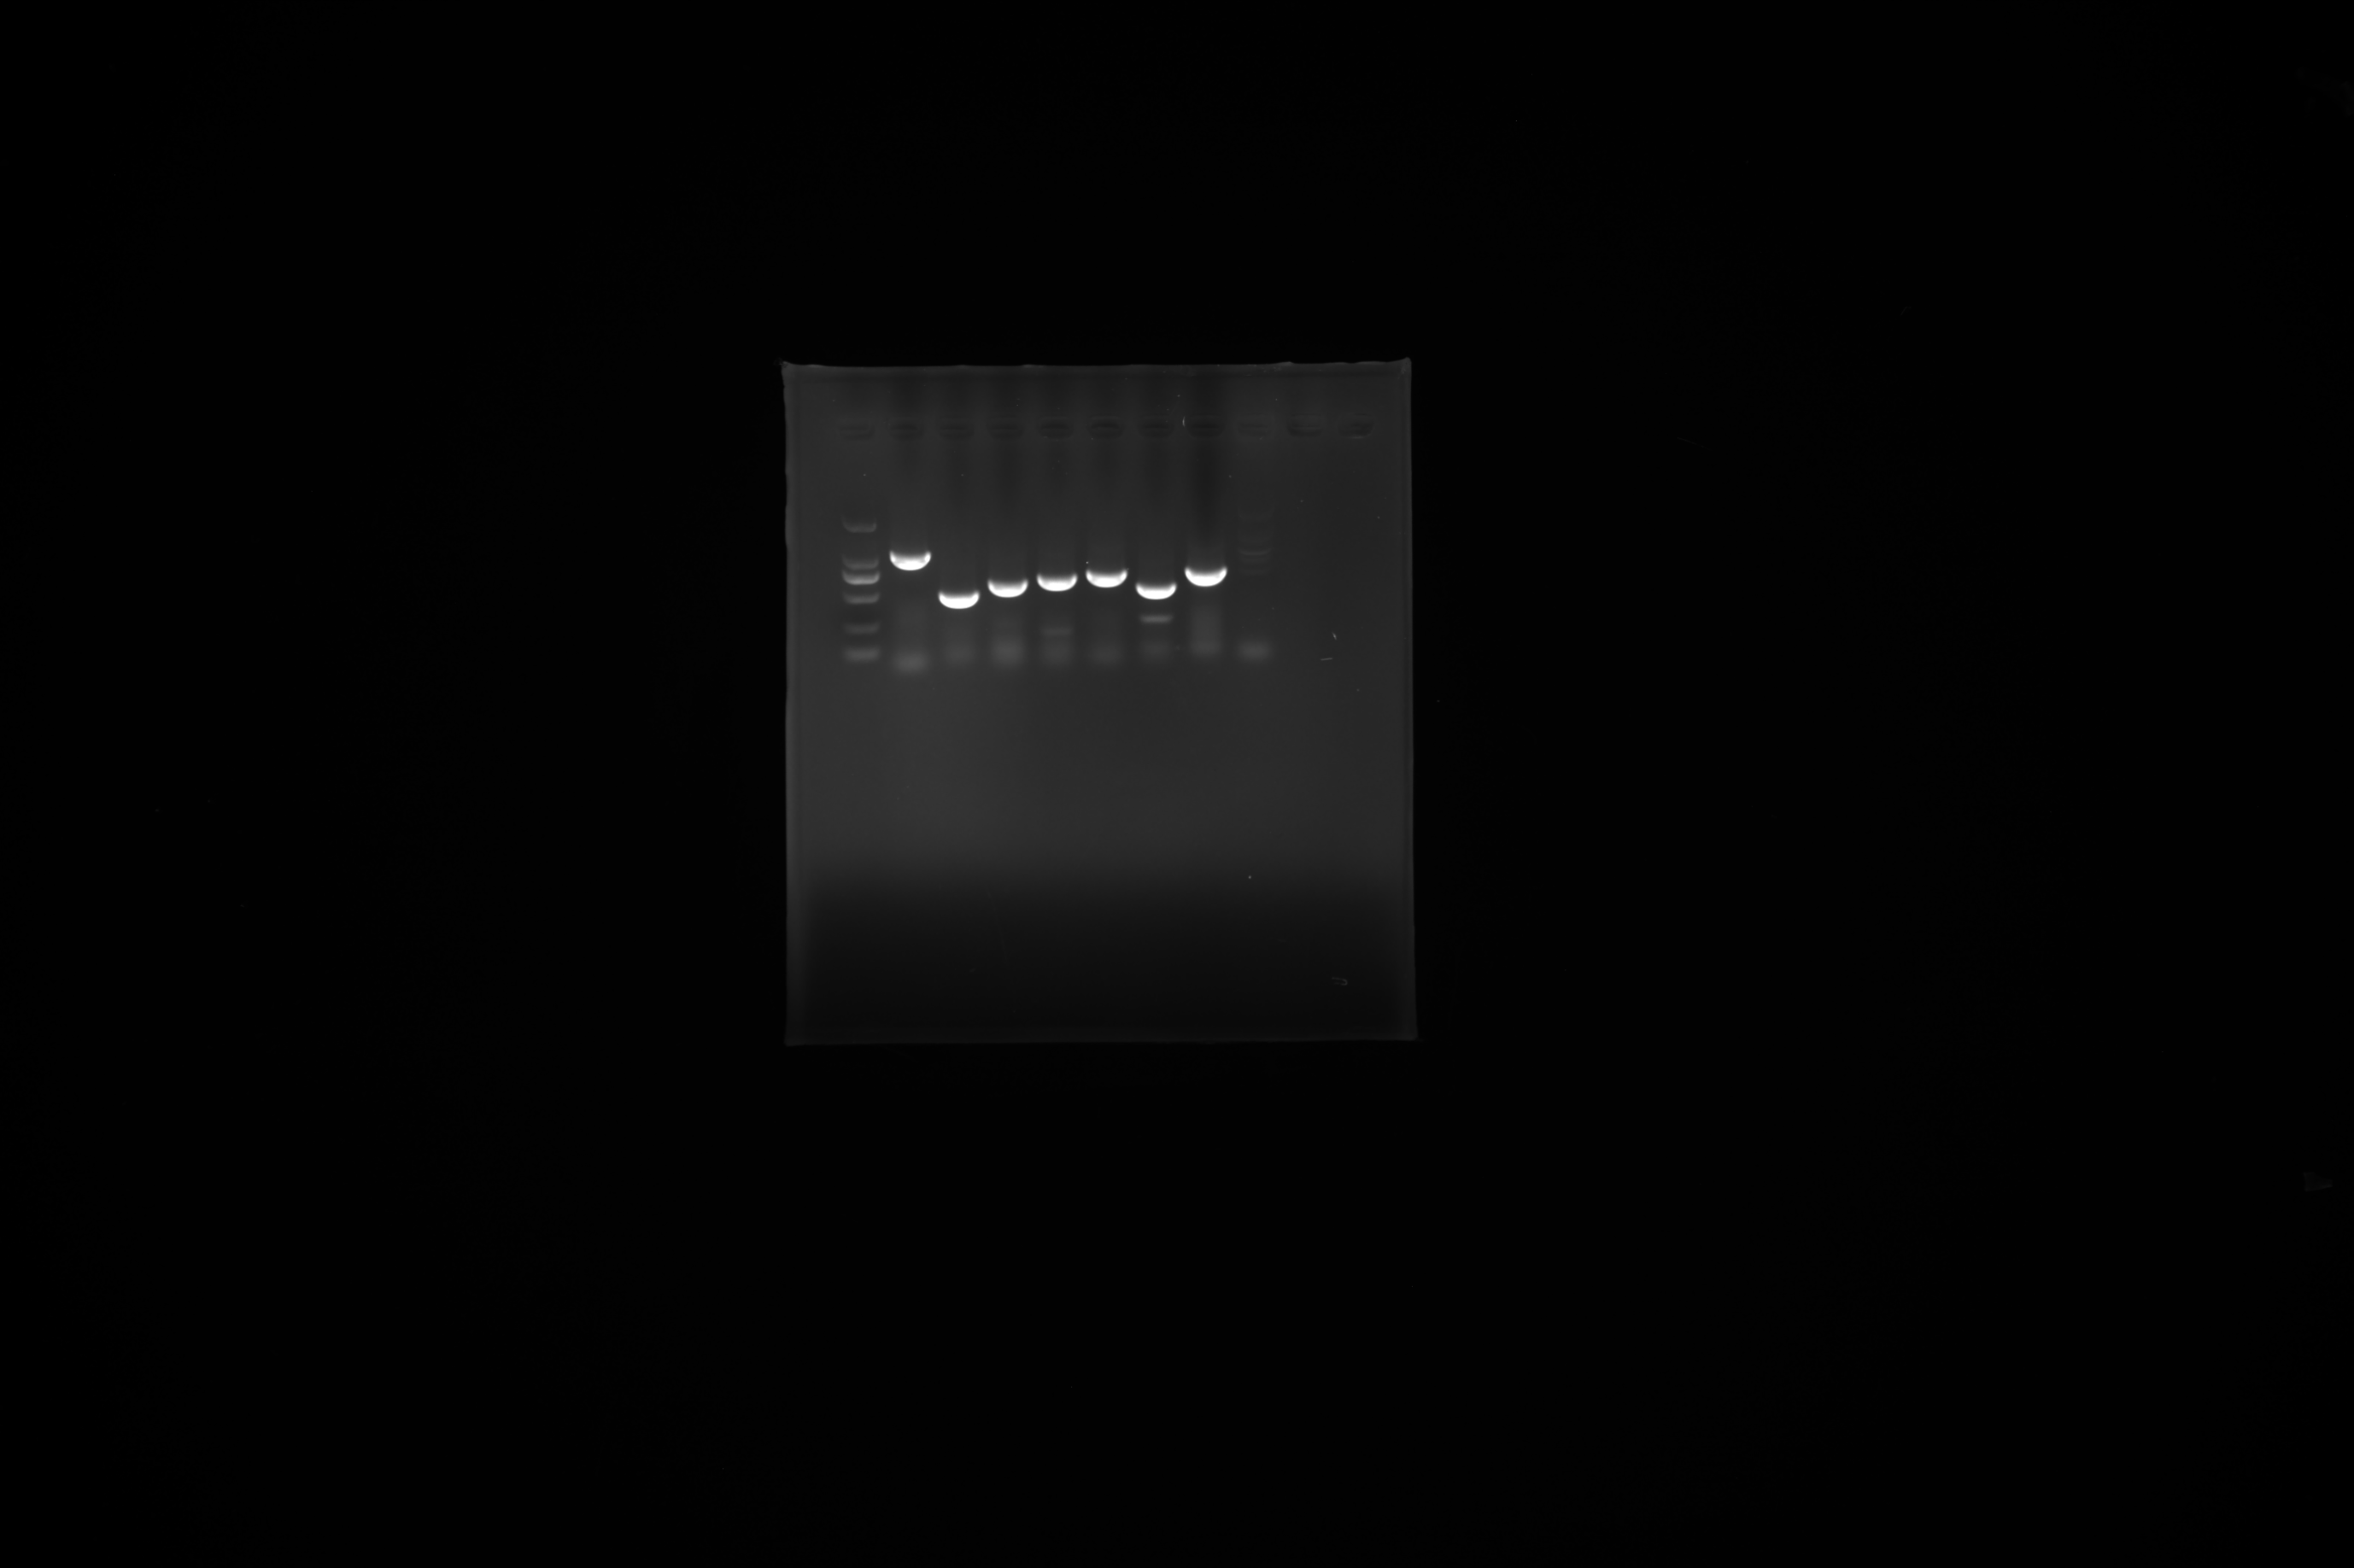


Mock + 1 2 3 4 5 6 7 -

bp

2000

1000

750

500

250

100

Fig.3A


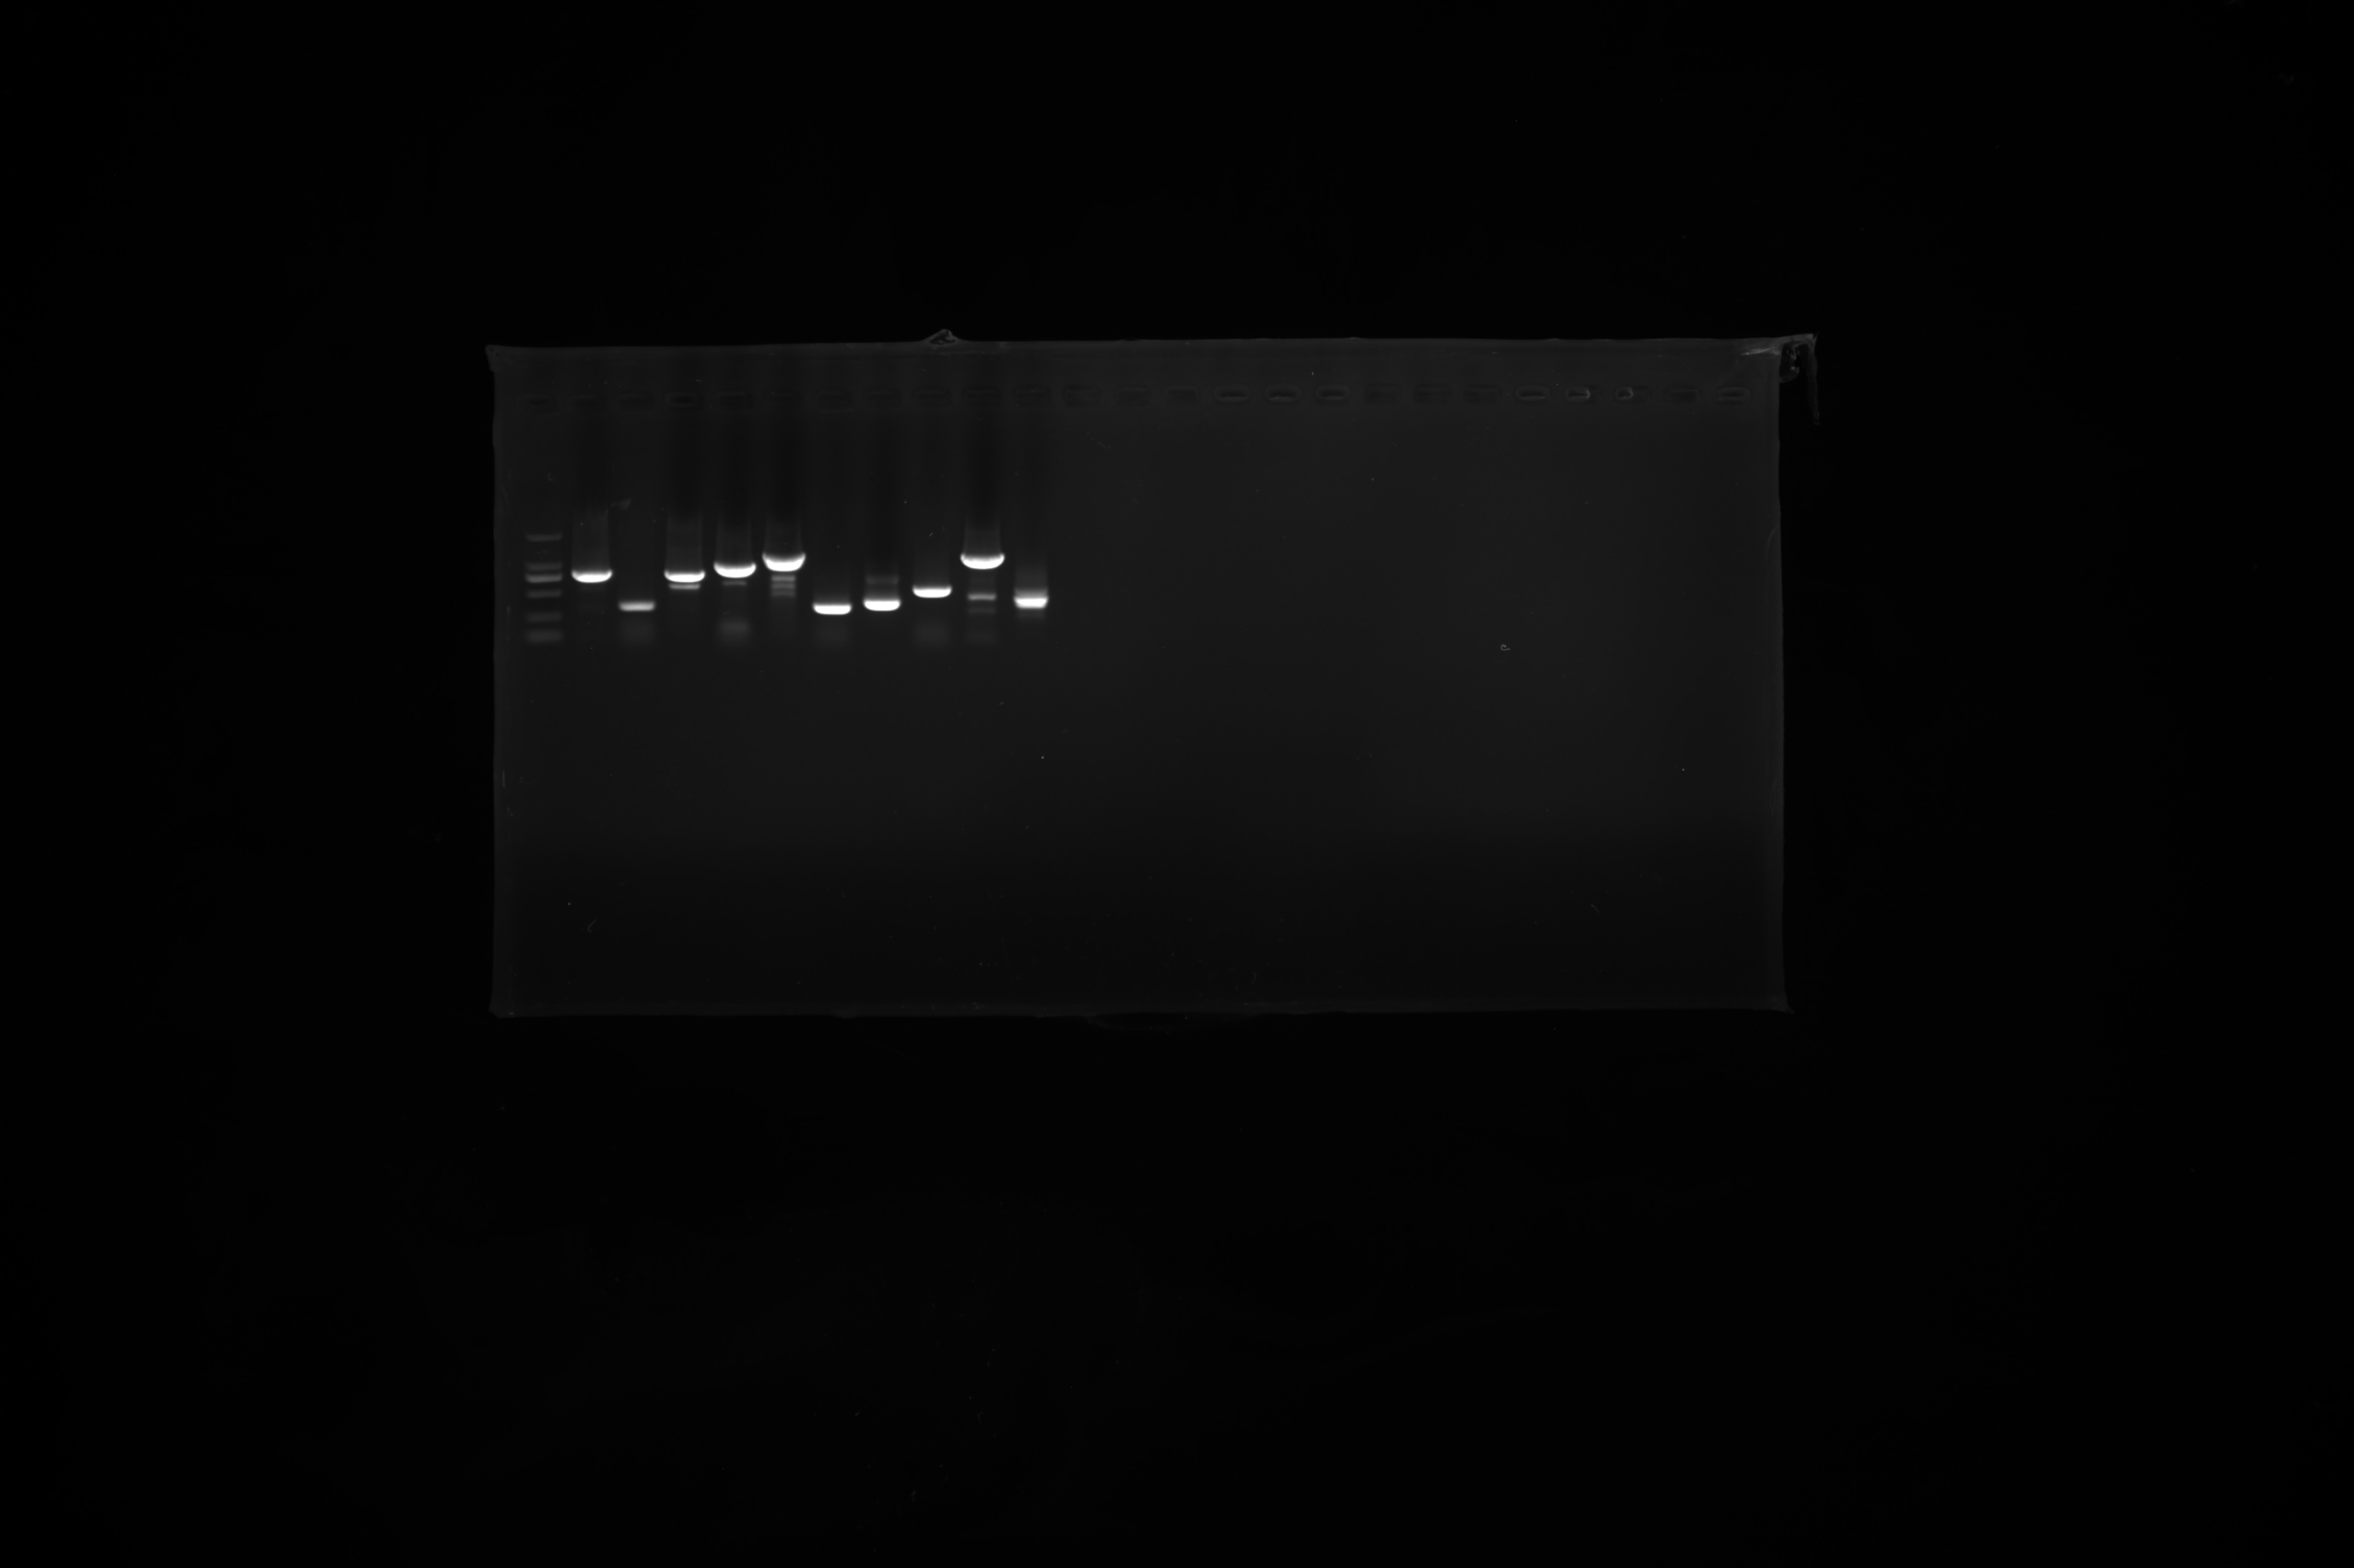


Mock 1 2 3 4 5 6 7 8 9 10 -

bp

2000

1000

750

500

250

100

Supplement: Supplementary file 2 [file cd3833445424a0192385a71d.docx]
